# Supplementary material for: Regioselective enzymatic hydrolysis of hexa-O-acetyl-lactal in a green non-aqueous medium
Source: Royal Society of Chemistry journal article supplement (doi:10.1039/c3ra40266e), 2013-01-01
Supplement: c3ra40266e.pdf [file c3ra40266e.pdf]

# **Regioselective enzymatic hydrolysis of hexa-*O*-acetyl-lactal in a green non-aqueous medium**

**Teodora Bavaro, Pamela Torres-Salas, Daniela Ubiali and Marco Terreni**

## **SUPPLEMENTARY INFORMATION**

## **TABLE OF CONTENTS**

|          |                                                                                 |           |
|----------|---------------------------------------------------------------------------------|-----------|
| <b>1</b> | <b>Stability of RML-OAg in alcohols (7% water v/v)</b>                          | <b>S3</b> |
| <b>2</b> | <b>Analytical characterization of penta-<i>O</i>-acetyl-3-hydroxylactal (2)</b> | <b>S4</b> |

## 1. Stability of RML-OAg in alcohols (7% water v/v)

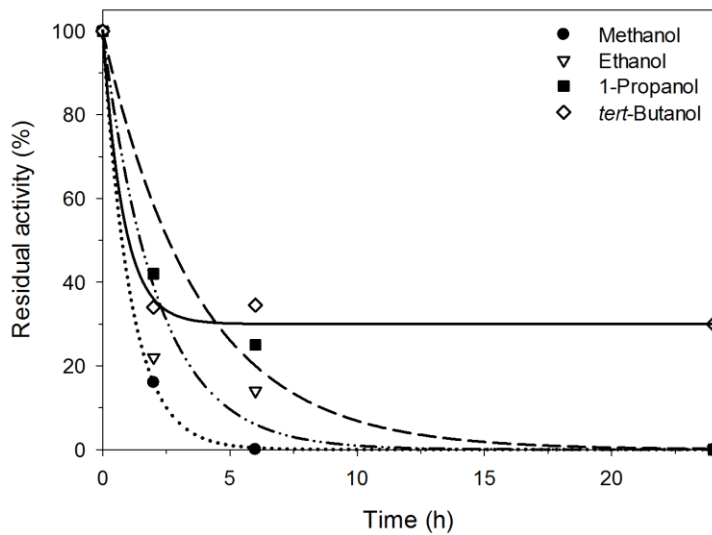

Stability of immobilized RML on octyl-agarose (RML-OAg) in alcohols (7% water v/v). For experimental details, see stability assay procedure in the main text.

## 2. Analytical characterization of penta-*O*-acetyl-3-hydroxylactal (2)

### General methods

*Nuclear Magnetic Resonance (NMR)*:  $^1\text{H}$  spectra was recorded in  $\text{CDCl}_3$  at 400.1 MHz on a Bruker AVANCE 400 Spectrometer (Bruker, Karlsruhe, Germany) equipped with a Topspin software package on a workstation running Windows operating system. Chemical shifts ( $\delta$ ) are given in ppm, and were referenced to the solvent signals ( $\delta_{\text{H}}$  7.26,  $\delta_{\text{C}}$  77.00). Signal multiplicities are abbreviated as follows: s, singlet; d, doublet; t, triplet; m, multiplet. Spectra analyses were carried out using iNMR reader software ([www.inmr.net](http://www.inmr.net)) on an Apple computer.

*Mass Spectrometry (MS)*: Mass spectra were recorded on a LCQ-DECA Thermo Finnigan Spectrometer according to the method of ionization ESI (Electron Spray Ionization) with an ionic source by the software Xcalibur 1.3 (Thermo-Finnigan, St. Jose, CA, USA). For sample injection, a flow of 5  $\mu\text{s}$  l/min was used. Analyses were run under positive modality and the experimental conditions are: voltage of the source 5.0 kVs, voltage of the capillary 14 V, flow of the gas 35 (arbitrary unity), temperature 200 °C.

**6,2',3',4',6'-Penta-*O*-acetyl-3-hydroxylactal (2)**:  $^1\text{H}$  NMR (400 MHz,  $\text{CDCl}_3$ ):  $\delta$  = 6.40 (d,  $J$  = 6.00 Hz, 1 H, 1-H), 5.37 (d,  $J$  = 3.32 Hz, 1 H, 4'-H), 5.23 (t,  $J$  = 8.00 Hz, 1 H, 2'-H), 5.02 (dd, 1 H, 3'-H), 4.78 (dd, 1 H, 2-H), 4.59 (d,  $J$  = 7.9 Hz, 1 H, 1'-H), 4.50 (m, 1 H, 3-H), 4.18–4.15 (m, 2 H, 6a-, 6'b-H), 4.10–4.02 (m, 2 H, 6'a-, 6b-H), 4.00 (m, 1 H, 5'-H), 3.98 (m, 1 H, 5-H), 3.65 (m, 1 H, 4-H), 2.00-2.18 (5 s, 15 H,  $\text{COCH}_3$ ) ppm.

MS (ESI) calcd for  $[\text{C}_{22}\text{H}_{30}\text{O}_{14} + \text{Na}]^+$  541.45, found 541.20.
